# Supplementary material
Source: PubMed Central journal article supplement (PMC5561344)

# Supplemental Figure 1

**a**

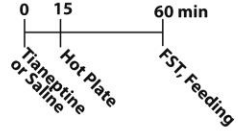

**b**

## Forced Swim Test

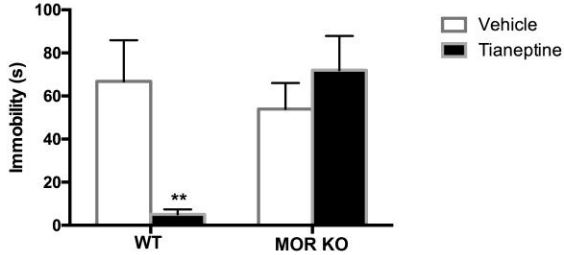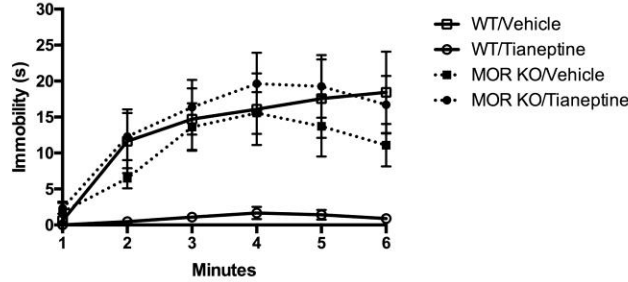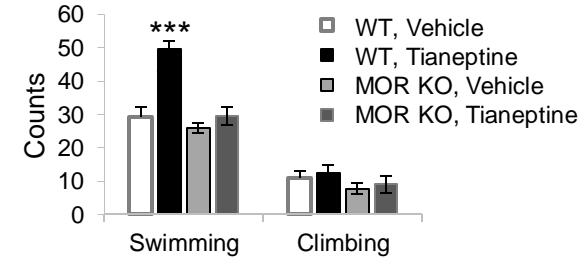

**c**

## Hypophagia

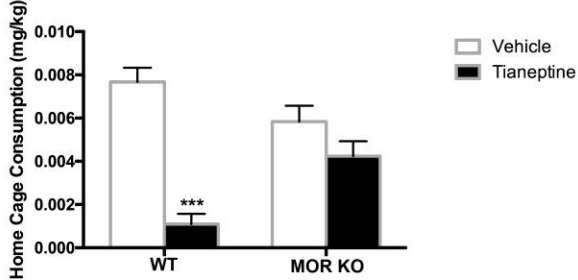

**d**

## Hot Plate

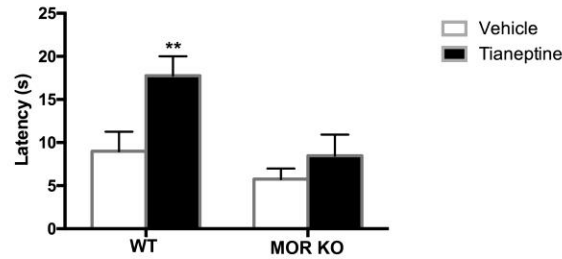

**e**

## Open Field

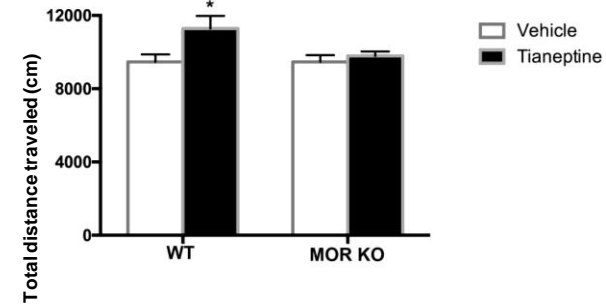

**f**

## Conditioned Place Preference

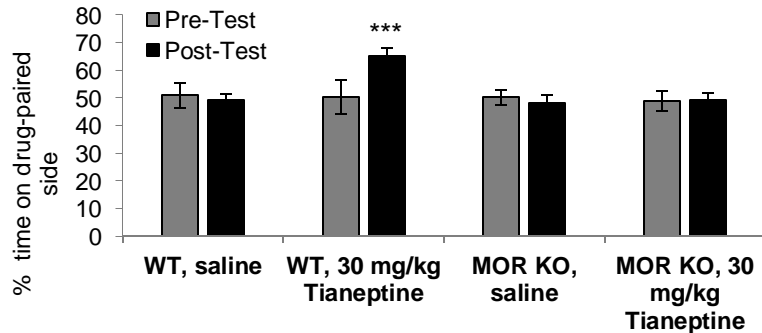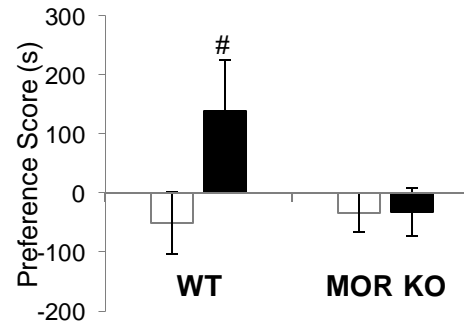

# Supplemental Figure 2

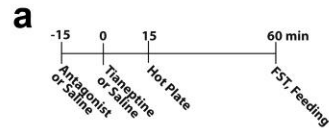

**b** Forced Swim Test

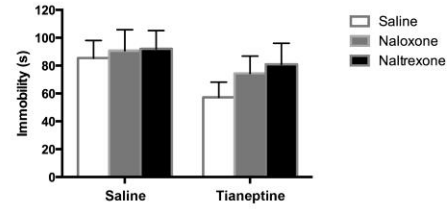

**f** Forced Swim Test

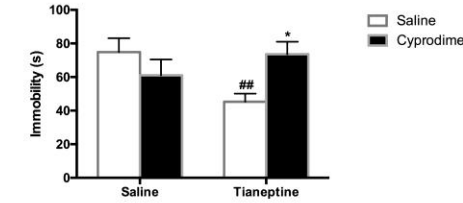

**c** Hypophagia

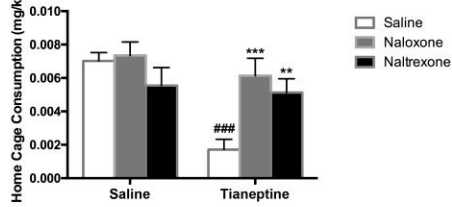

**g** Hypophagia

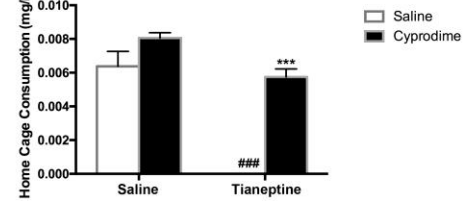

**d** Hot Plate

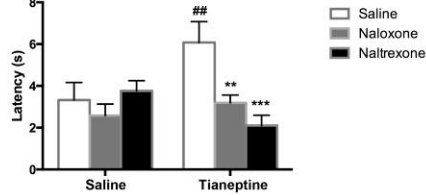

**h** Hot Plate

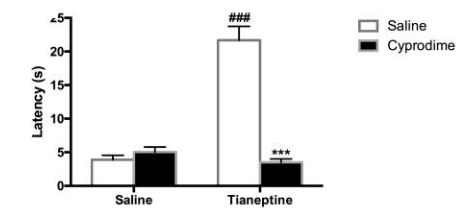

**e** Open Field

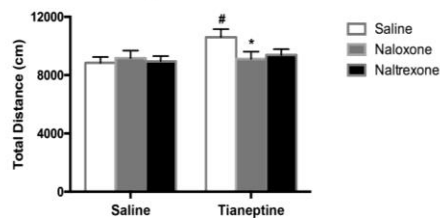

**i** Open Field

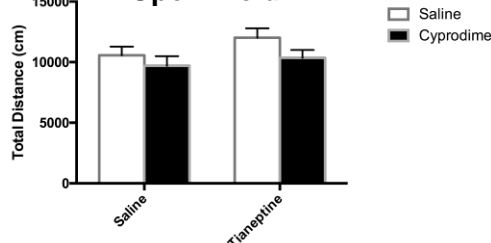

# Supplemental Figure 3

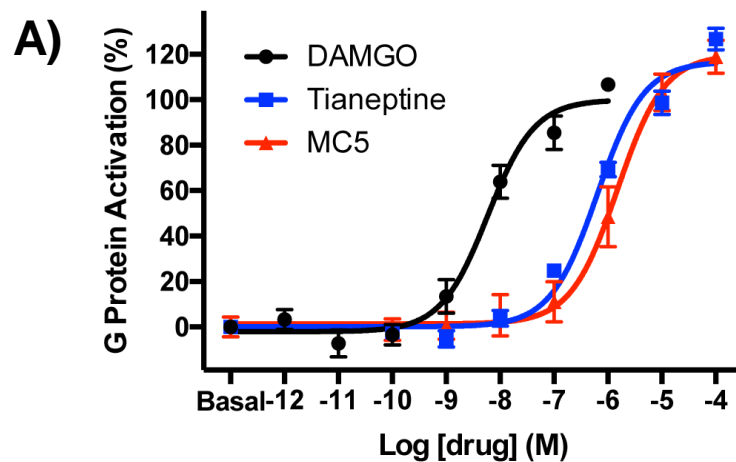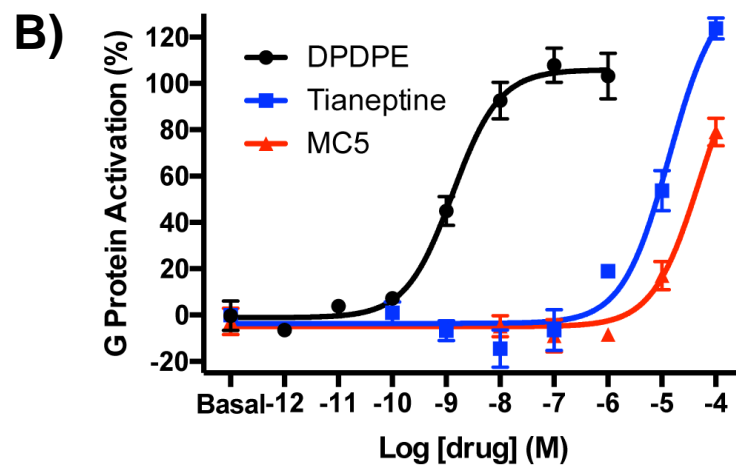

# Supplemental Figure 4

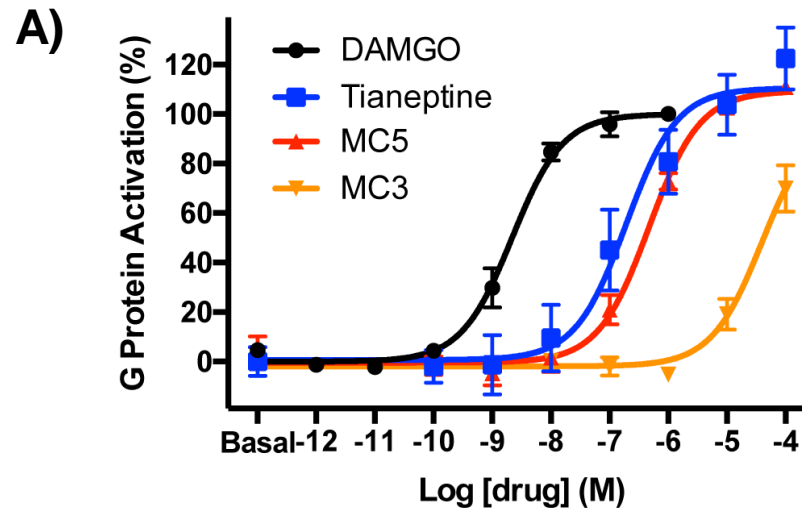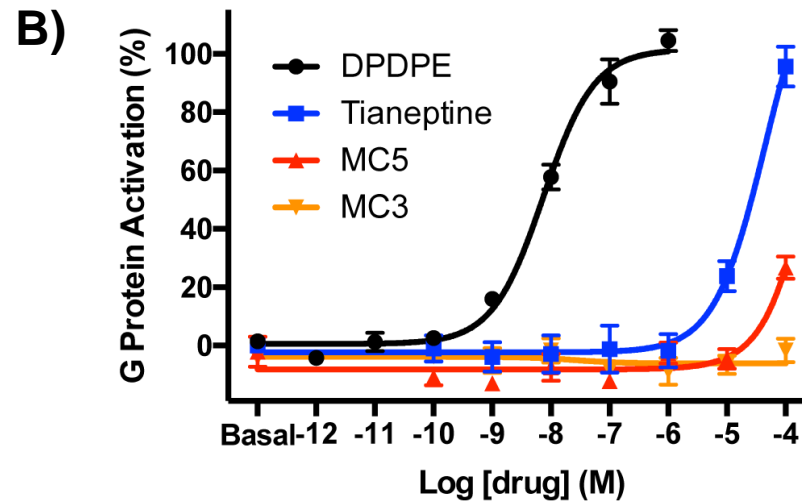

Supplement: npp201760x2.pdf [file npp201760x2.pdf]
